# Supplementary figures and images for: Distribution Patterns of Benthic Foraminifera in Fish Farming Areas (Corsica, France): Implications for the Implementation of Biotic Indices in Biomonitoring Studies
Source: MDPI journal article supplement (doi:10.3390/w13202821), 2021-10-11

Figure S1. Pictures of the sea bed for each sampled station.

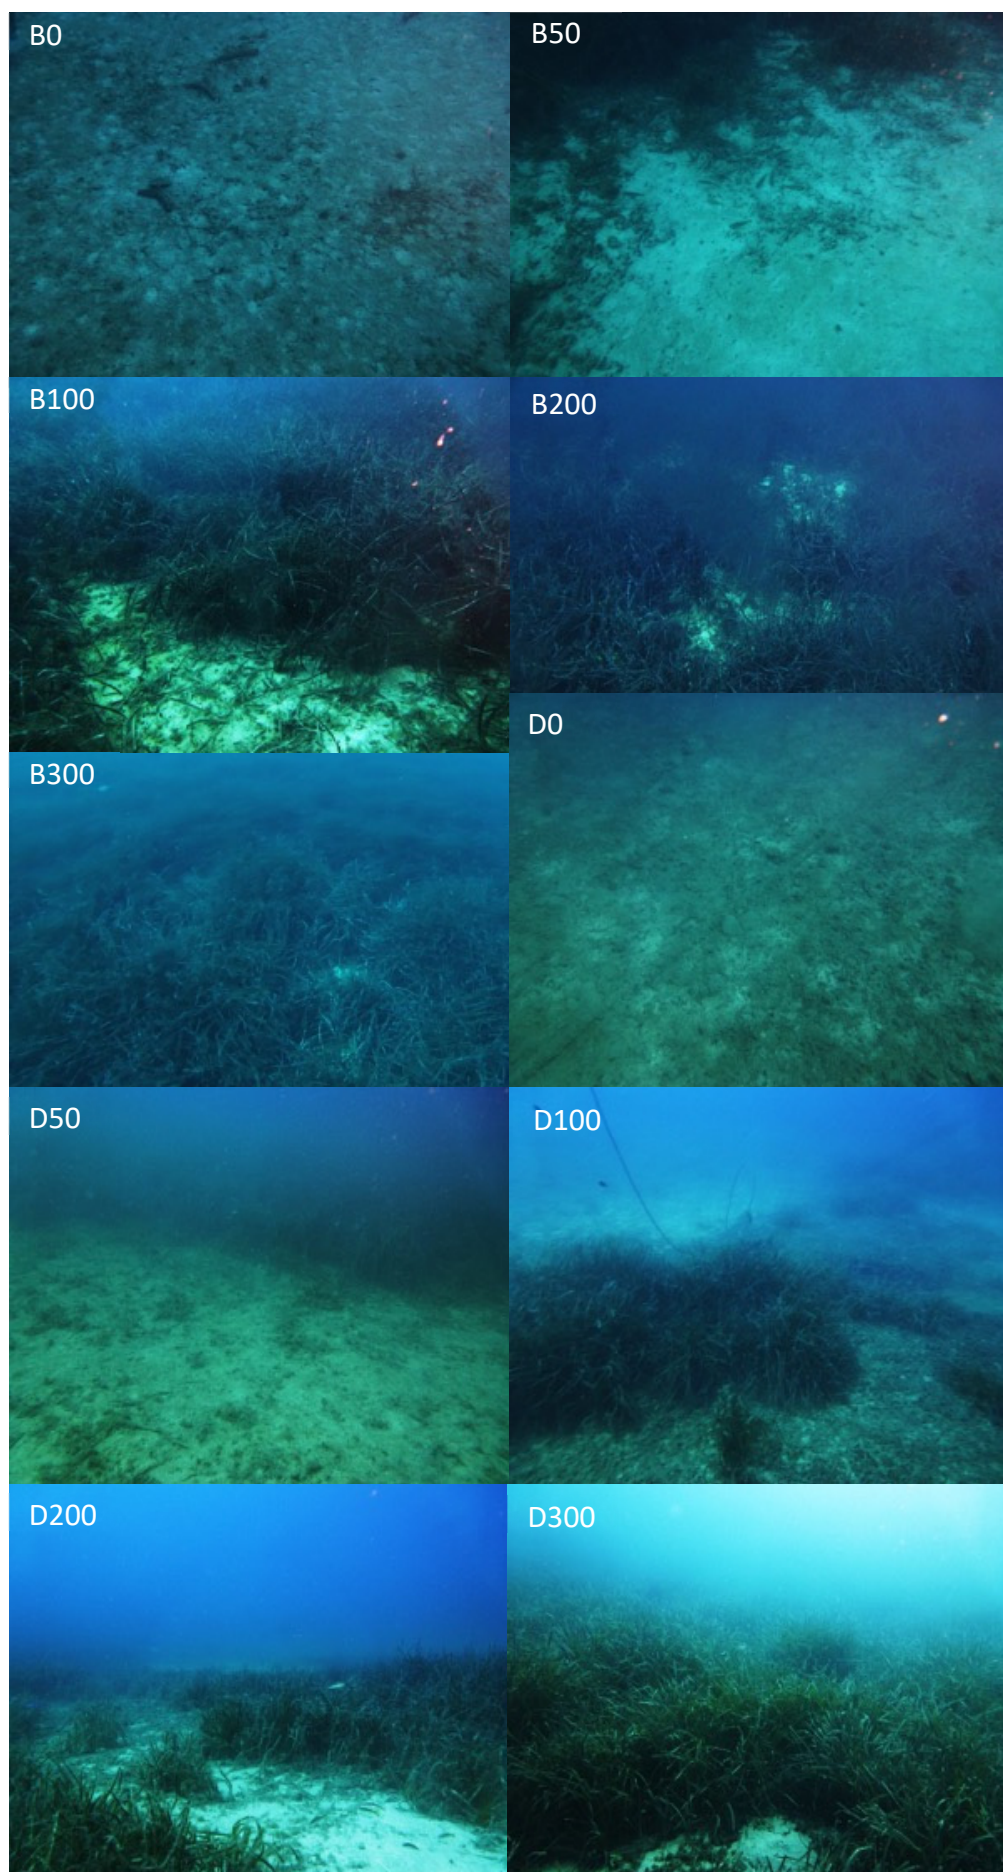

Supplement: s1 [file s1]
